# Supplementary material
Source: PubMed Central journal article supplement (PMC1159139)

## SUPPLEMENTARY FIGURE

### Reproducibility of in vitro fat oxidation assays.

**A.** in vitro suppressibility, % suppression  $^{14}\text{CO}_2$ . **B.** in vitro adaptability, fold increase  $^{14}\text{CO}_2$ . **C.** in vitro suppressibility: maximal FOx ( $^{14}\text{CO}_2$ ), measured at 0mM glucose, 20 $\mu\text{M}$  palmitate. **D.** in vitro suppressibility: suppressed FOx ( $^{14}\text{CO}_2$ ), measured at 5m glucose, 20 $\mu\text{M}$  palmitate. **E.** in vitro adaptability: basal FOx ( $^{14}\text{CO}_2$ ), measured at 0 $\mu\text{M}$  cold palmitate (1 $\mu\text{Ci/ml}$   $^{14}\text{C}$ -palmitate). **F.** in vitro adaptability: FOx ( $^{14}\text{CO}_2$ ), measured at 100 $\mu\text{M}$  cold palmitate. To determine reproducibility of in vitro FOx measurement, cells from the same individual were cultured on two separate occasions and FOx assays were performed in two independent experiments. For all assays, 1 $\mu\text{Ci/ml}$   $^{14}\text{C}$ -palmitate was used. Data are normalized to protein content. n=7 (suppressibility), n=8 (adaptability). FOx – fat oxidation.

# Supplement 1

## Suppressibility

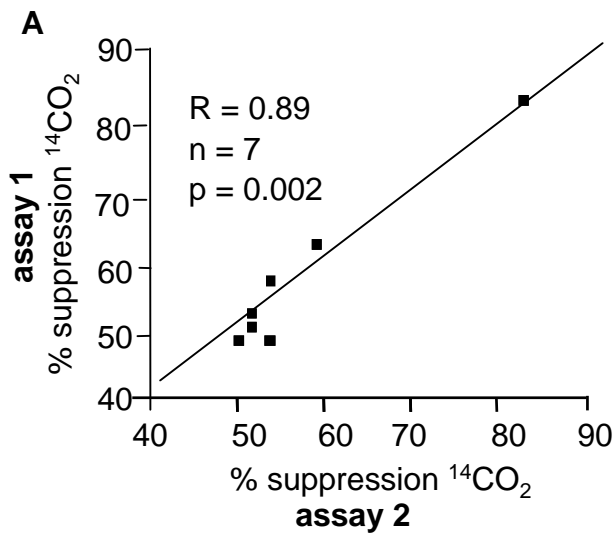

## Adaptability

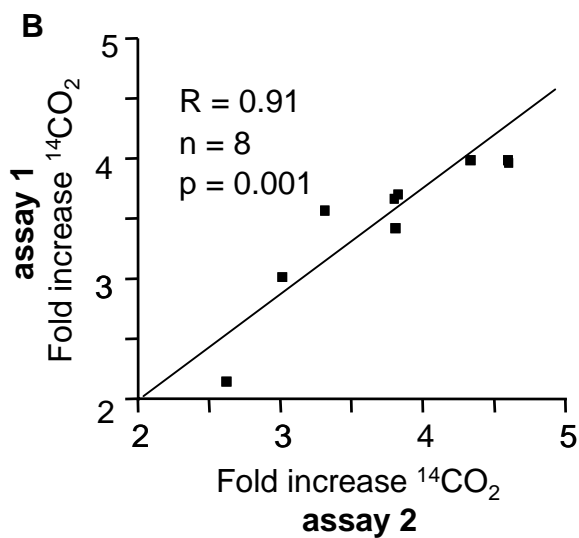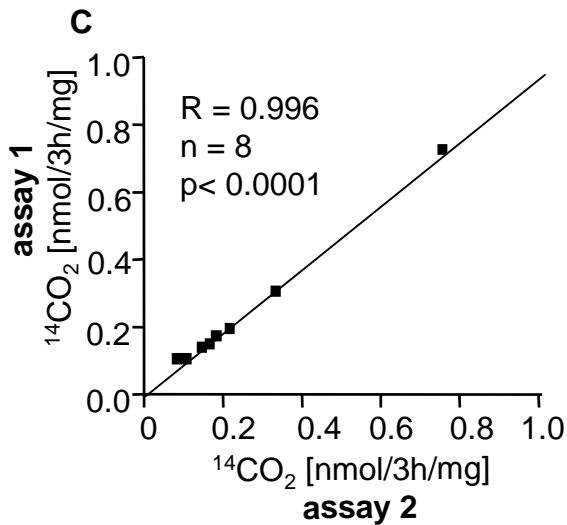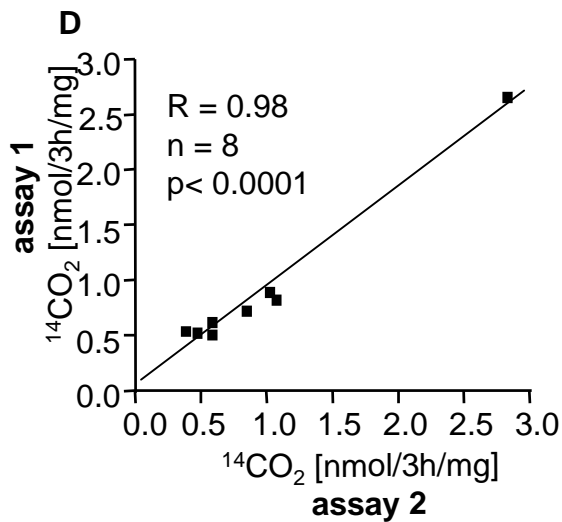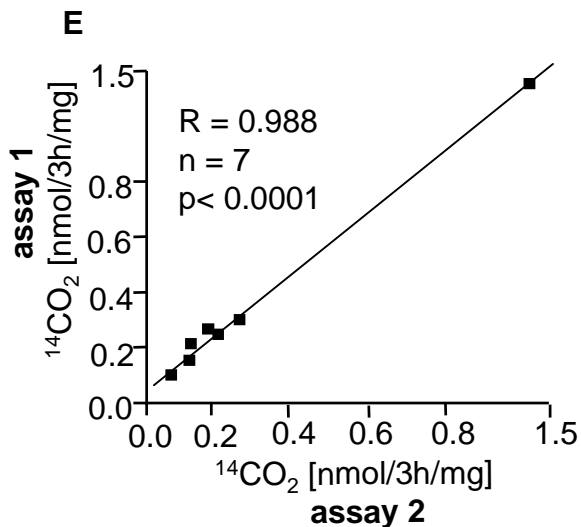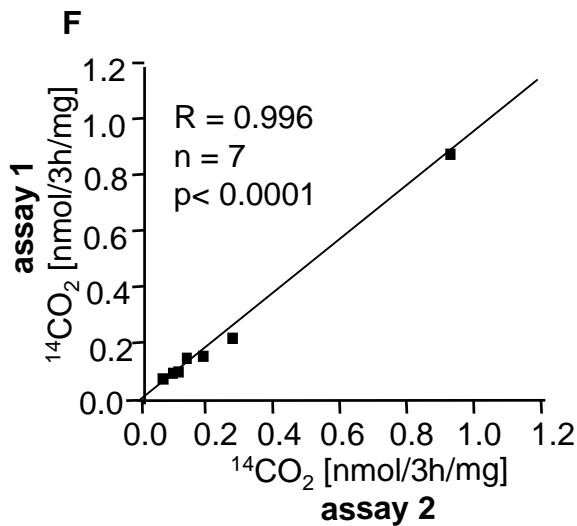

Supplement: JCI0524332.sd.pdf [file JCI0524332.sd.pdf]
